# Supplementary material
Source: publisher site journal article supplement (https://www.dovepress.com/get_supplementary_file.php?f=197455a.xlsx)
Supplement: Supplementary file 1 [file get_supplementary_file.php]

## Sheet: Sheet1
Sample_id	Sex	Age(y)	AFP(ng/mL)	Tumour Size(cm)
R1-1	M	49	331	8
R1-2	F	64	43322	16
R1-3	M	20	6905	5
R1-6	F	68	2	2
R1-7	M	60	3	10
R1-9	M	45	1618	4
R1-15	M	60	8	2
R1-16	M	44	13	2
R1-17	M	42	468	5
R1-19	F	48	55	2
R1-20	M	39	7	3
R1-25	M	52	3	10
R1-26	M	58	400	4
R1-30	M	44	5	9
R1-33	M	77	3	4
R1-42	M	59	24	6
R1-44	F	40	25235	6
R1-45	M	39	125700	10
R1-46	M	43	3	6
R1-47	F	23	484000	10
R1-57	M	60	128	2
R1-60	M	66	8	6
R1-63	M	58	15500	7
R1-67	F	23	1	4
R1-74	M	34	5	5
R1-76	M	38	10	2
R1-80	M	37	5652	12
R1-84	M	36	4	3
R1-85	M	31	1632	10
R1-87	M	68	10979	16
R1-88	M	66	48440	7
R1-89	M	71	92	6
R1-93	M	67	3	3
